# Supplementary material for: The Antiprotozoal Activity of Papua New Guinea Propolis and Its Triterpenes
Source: MDPI journal article supplement (doi:10.3390/molecules27051622), 2022-03-01
Supplement: s1 [file s1]

# The Antiprotozoal Activity of Papua New Guinea Propolis and Its Triterpenes

Samya S. Alenezi <sup>1</sup>, Naif D. Alenezi <sup>1</sup>, Godwin U. Ebiloma <sup>2,3</sup>, Manal J. Natto <sup>2</sup>, Marzuq A. Ungogo <sup>2</sup>, John O. Igoli <sup>2,4</sup>, Valerie A. Ferro <sup>1</sup>, Alexander I. Gray <sup>1</sup>, James Fearnley <sup>5</sup>, Harry P. de Koning <sup>2,\*</sup> and David G. Watson <sup>1,\*</sup>

<sup>1</sup> Strathclyde Institute of Pharmacy and Biomedical Science, University of Strathclyde, 161 Cathedral Street, Glasgow G4 0RE, UK; sameahq8@gmail.com (S.S.A.); ndenzi@sfda.gov.sa (N.D.A.); v.a.ferro@strath.ac.uk (V.A.F.); a.i.gray345@gmail.com (A.I.G.)

<sup>2</sup> Institute of Infection, Immunity and Inflammation, College of Medical, Veterinary and Life Sciences, University of Glasgow, Glasgow G12 8TA, UK; g.ebiloma@tees.ac.uk (G.U.E.); manal.natto@glasgow.ac.uk (M.J.N.); 2226184u@student.gla.ac.uk (M.A.U.); j.o.igoli@uam.edu.ng (J.O.I.)

<sup>3</sup> School of Health and Life Sciences, Teesside University, Middlesbrough TS1 3BX, UK

<sup>4</sup> Phytochemistry Research Group, Department of Chemistry, University of Agriculture, Makurdi PMB 2373, Nigeria

<sup>5</sup> BeeVital, Whitby, North Yorkshire YO22 5JR, UK; james.fearnley@beevitalpropolis.com

\* Correspondence: harry.de-koning@glasgow.ac.uk (H.P.d.K.); d.g.watson@strath.ac.uk (D.G.W.)

**Figure S1 Work Flow**

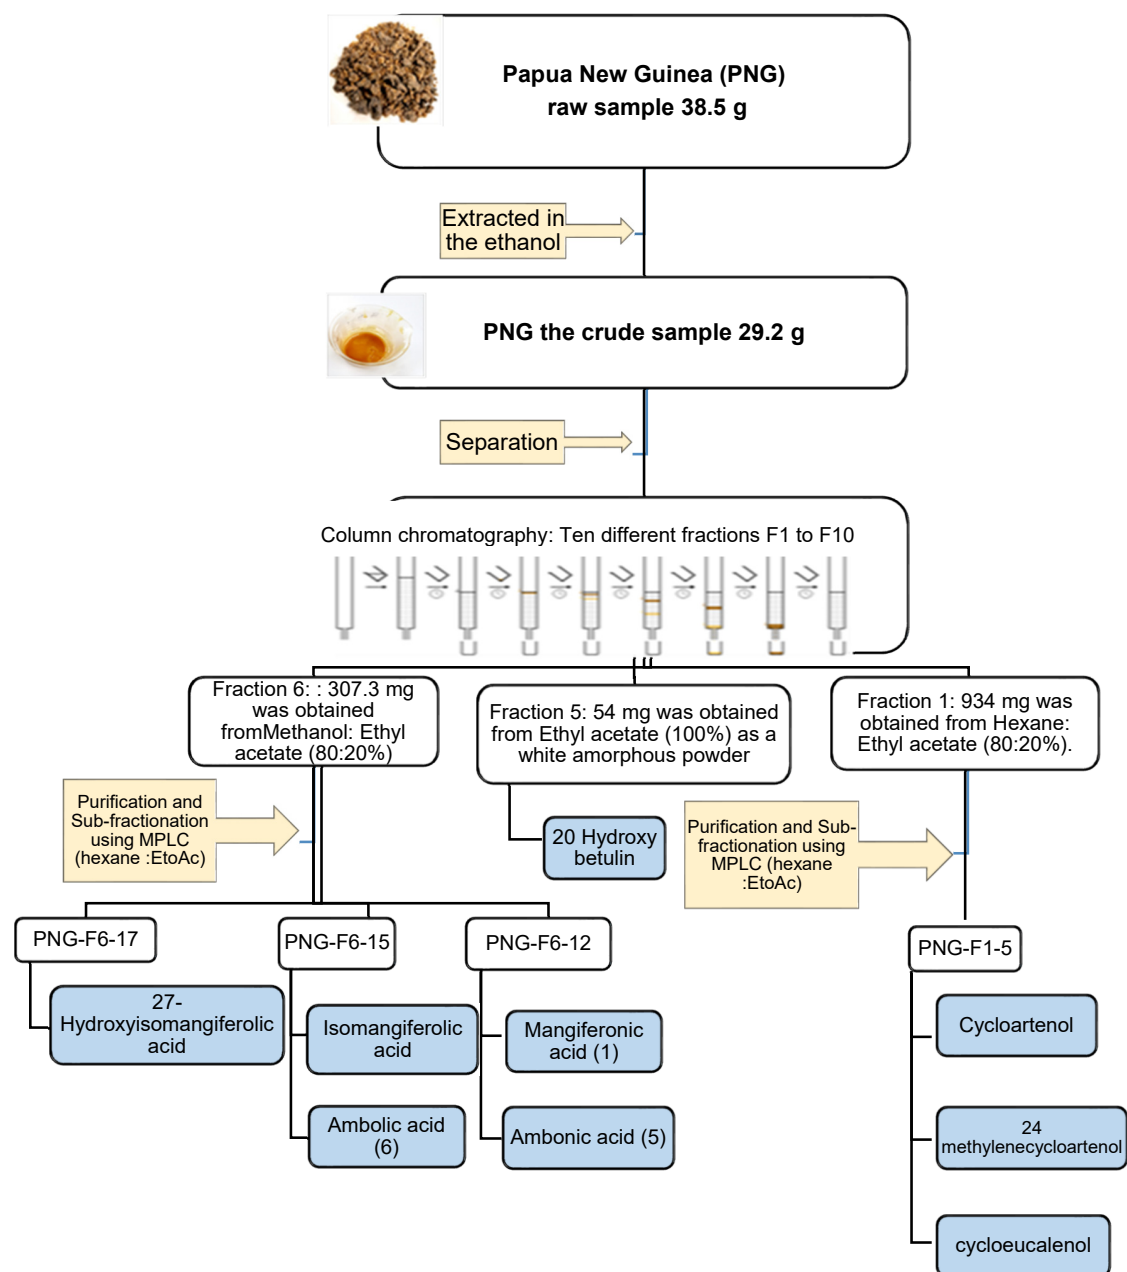

*S1 Characterization of PNG-F1-5 as mixture of Cycloartenol, 24 (28)-Methylenecycloartenol and Cycloeucalenol*

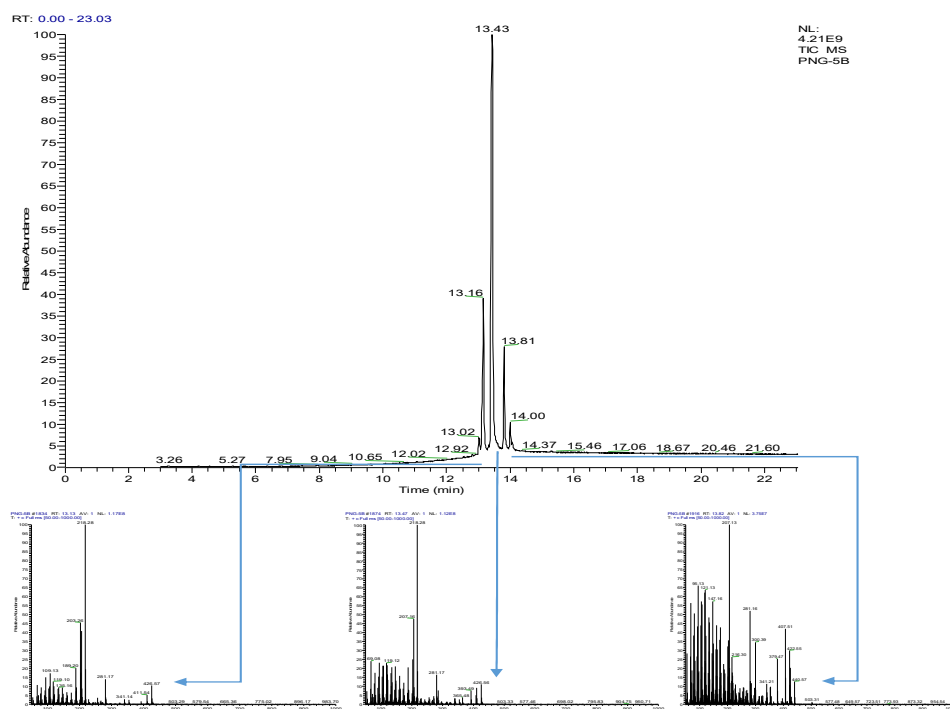

**Figure S2** GC-MS analysis of cycloartenol (13.16 min), 24 (28)-methylenecycloartenol (13.43 min.) and cycloeucalenol (13.61 min.) in fraction PNG-F1-5B

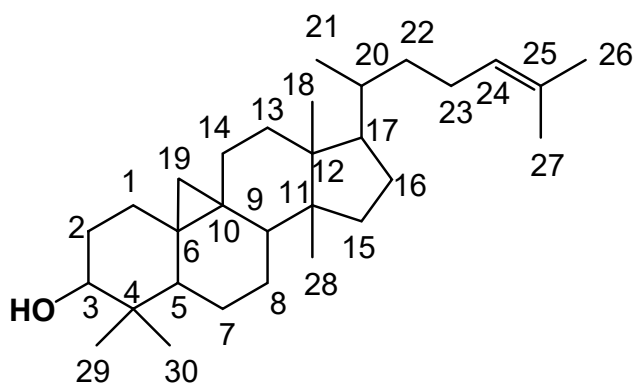

**Figure S3** Cycloartenol

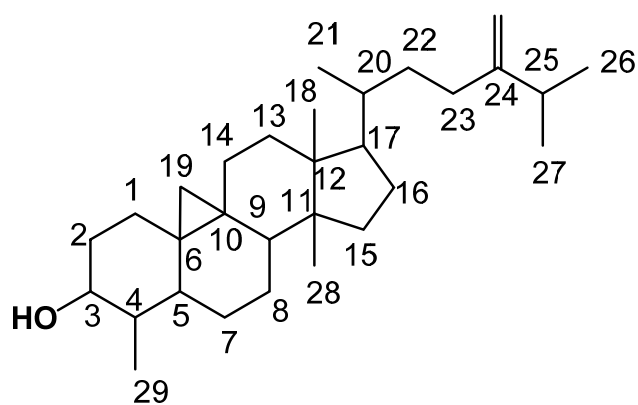

**Figure S4** 24-Methylenecycloartanol

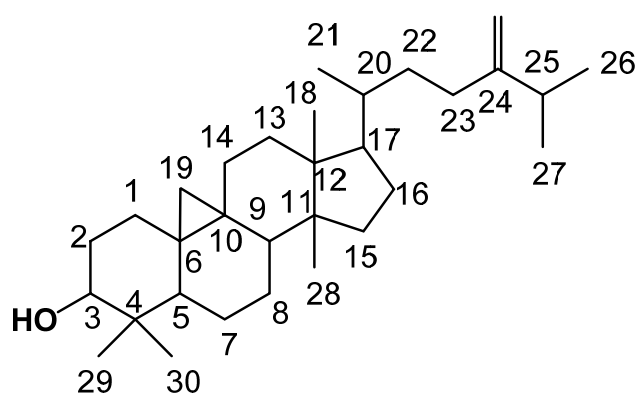

**Figure S5** Cycloeucalenol

**Table S1**  $^1\text{H}$  (500MHz),  $^{13}\text{C}$  (100MHz) data for the mixture of cycloartenol, methylene cycloartenol and cycloeucalenol.

| Position | Compound                             |                              |                                      |                              |                                      |                              |
|----------|--------------------------------------|------------------------------|--------------------------------------|------------------------------|--------------------------------------|------------------------------|
|          | Cycloartenol                         |                              | 24 (28)-methylenecycloartenol        |                              | Cycloeucalenol                       |                              |
|          | $^1\text{H}$ $\delta$ ppm (mult, J)  | $^{13}\text{C}$ $\delta$ ppm | $^1\text{H}$ $\delta$ ppm (mult, J)  | $^{13}\text{C}$ $\delta$ ppm | $^1\text{H}$ $\delta$ ppm (mult, J)  | $^{13}\text{C}$ $\delta$ ppm |
| 1        | 1.55 1H (m), 1.28 1H (m)             | 32.0 (CH <sub>2</sub> )      | 1.55 1H (m), 1.28 1H (m)             | 32.0 (CH <sub>2</sub> )      | 1.55 1H (m), 1.28 1H (m)             | 30.4 (CH <sub>2</sub> )      |
| 2        | 1.92 1H (m), 1.65 1H (m)             | 26.5 (CH <sub>2</sub> )      | 1.92 1H (m), 1.65 1H (m)             | 26.6 (CH <sub>2</sub> )      | 1.83 1H (m), 1.59 1H (m)             | 27.0 (CH <sub>2</sub> )      |
| 3        | 3.31 (m)                             | 78.9 (CH)                    | 3.26 (m)                             | 79.1 (CH)                    | 3.22 (m)                             | 79.0 (CH)                    |
| 4        | -                                    | 40.5 (C)                     | -                                    | 40.0 (C)                     | 1.32 (m)                             | 41.5 (C)                     |
| 5        | 1.32 1H (m)                          | 39.6 (CH)                    | 1.32 1H (m)                          | 39.7 (CH)                    | 1.32 1H (m)                          | 41.8 (CH)                    |
| 6        | 1.65 1H (m), 0.81 1H (m)             | 21.1 (CH <sub>2</sub> )      | 1.65 1H (m), 0.81 1H (m)             | 21.1 (CH <sub>2</sub> )      | 1.65 1H (m), 0.81 1H (m)             | 20.9 (CH <sub>2</sub> )      |
| 7        | 1.15 1H (m), 1.32 1H (m)             | 26.0 (CH <sub>2</sub> )      | 1.15 1H (m), 1.32 1H (m)             | 26.0 (CH <sub>2</sub> )      | 1.15 1H (m), 1.32 1H (m)             | 26.5 (CH <sub>2</sub> )      |
| 8        | 1.52 1H (m)                          | 47.1 (CH)                    | 1.52 1H (m)                          | 47.1 (CH)                    | 1.52 1H (m)                          | 47.2 (CH)                    |
| 9        | -                                    | 20.1 (C)                     | -                                    | 19.9 (C)                     | -                                    | 23.6 (C)                     |
| 10       | -                                    | 26.0 (C)                     | -                                    | 26.1 (C)                     | -                                    | 26.2 (C)                     |
| 11       | 1.07 1H (m), 0.81 (m)                | 28.1 (CH <sub>2</sub> )      | 1.07 1H (m), 0.81 (m)                | 28.1 (CH <sub>2</sub> )      | 1.07 1H (m), 0.81 (m)                | 28.1 (CH <sub>2</sub> )      |
| 12       | 1.59 1H (m), 1.28 1H (m)             | 32.9 (CH <sub>2</sub> )      | 1.59 1H (m), 1.28 1H (m)             | 35.7 (CH <sub>2</sub> )      | 1.59 1H (m), 1.28 1H (m)             | 32.9 (CH <sub>2</sub> )      |
| 13       | -                                    | 45.2 (C)                     | -                                    | 45.2 (C)                     | -                                    | 45.3 (C)                     |
| 14       | -                                    | 48.7 (C)                     | -                                    | 49 (C)                       | -                                    | 49.0 (C)                     |
| 15       | 1.33 1H (m), 0.90 1H (m)             | 32.9 (CH <sub>2</sub> )      | 1.33 1H (m), 0.90 1H (m)             | 32.9 (CH <sub>2</sub> )      | 1.33 1H (m), 0.90 1H (m)             | 32.9 (CH <sub>2</sub> )      |
| 16       | 2.02 1H (m), 1.32 1H (m)             | 71.8 (CH <sub>2</sub> )      | 2.02 1H (m), 1.32 1H (m)             | 26.5 (CH <sub>2</sub> )      | 2.02 1H (m), 1.32 1H (m)             | 28.6 (CH <sub>2</sub> )      |
| 17       | 1.65 1H (m)                          | 52.3 (CH)                    | 1.65 1H (m)                          | 52.5 (CH)                    | 1.65 1H (m)                          | 52.2 (CH)                    |
| 18       | 0.99 3H (s)                          | 18.2 (CH <sub>3</sub> )      | 0.99 1H (s)                          | 18 (CH <sub>3</sub> )        | 0.99 1H (s)                          | 17.8 (CH <sub>3</sub> )      |
| 19       | 0.58 1H (d, 4.21), 0.35 1H (d, 4.18) | 29.7 (CH <sub>2</sub> )      | 0.58 1H (d, 4.21), 0.35 1H (d, 4.18) | 29.9 (CH <sub>2</sub> )      | 0.58 1H (d, 4.21), 0.35 1H (d, 4.18) | 29.9 (CH <sub>2</sub> )      |
| 20       | 1.40 1H (m)                          | 30.3 (CH)                    | 1.40 1H (m)                          | 36 (CH)                      | 1.40 1H (m)                          | 36.0 (CH)                    |
| 21       | 0.92 3H (s)                          | 18.0 (CH <sub>3</sub> )      | 0.92 3H (s)                          | 18.3 (CH <sub>3</sub> )      | 0.92 3H (s)                          | 18.4 (CH <sub>3</sub> )      |
| 22       | 1.33 2H (m)                          | 35.5 (CH <sub>2</sub> )      | 1.33 2H (m)                          | 35.6 (CH <sub>2</sub> )      | 1.33 2H (m)                          | 35.6 (CH <sub>2</sub> )      |
| 23       | 1.77 1H (m), 0.97 1H (m)             | 24.9 (CH <sub>2</sub> )      | 2.02 1H (m), 1.65 1H (m)             | 31.2 (CH <sub>2</sub> )      | 2.23 1H (m), 1.65 1H (m)             | 31.1 (CH <sub>2</sub> )      |

|    |                   |                         |                                  |                          |                                             |                          |
|----|-------------------|-------------------------|----------------------------------|--------------------------|---------------------------------------------|--------------------------|
| 24 | 5.21 1H (t, 3.68) | 121.7 (CH)              | -                                | 156.9 (C)                | -                                           | 156.5 (C)                |
| 25 | -                 | 130.7 (C)               | 2.33 (m)                         | 33.8 (CH)                | 2.33 (m)                                    | 33.9 (CH)                |
| 26 | 1.71 3H (s)       | 26.1 (CH <sub>3</sub> ) | 1.28 3H                          | 21.8 (CH <sub>3</sub> )  | 1.026 d                                     | 22.1 (CH <sub>3</sub> )  |
| 27 | 1.63 3H (s)       | 18.2 (CH <sub>3</sub> ) | 1.02 3H (s)                      | 23.7 (CH <sub>3</sub> )  | 1.03 3H (s)                                 | 23.3 (CH <sub>3</sub> )  |
| 28 | 0.90 3H (s)       | 19.3 (CH <sub>3</sub> ) | 0.90 3H (s)                      | 19.1 (CH <sub>3</sub> )  | 0.90 3H (s)                                 | 19.1 (CH <sub>3</sub> )  |
| 29 | 0.83 3H (s)       | 14.0 (CH <sub>3</sub> ) | 0.83 3H (s)                      | 10.1 (CH <sub>3</sub> )  | 0.83 3H (s)                                 | 14.46 (CH <sub>3</sub> ) |
| 30 | 0.99 3H (s)       | 25.5 (CH <sub>3</sub> ) | 0.99 3H (s)                      | 25.7 (CH <sub>3</sub> )  | 4.59 1H (dd,, 2.74, 1.38) 4.71 1H (d, 2.64) | 106.9 (CH <sub>2</sub> ) |
| 31 |                   |                         | 4.69 1H (d, 1.59)<br>4.74 1H (s) | 109.3 (CH <sub>2</sub> ) |                                             |                          |

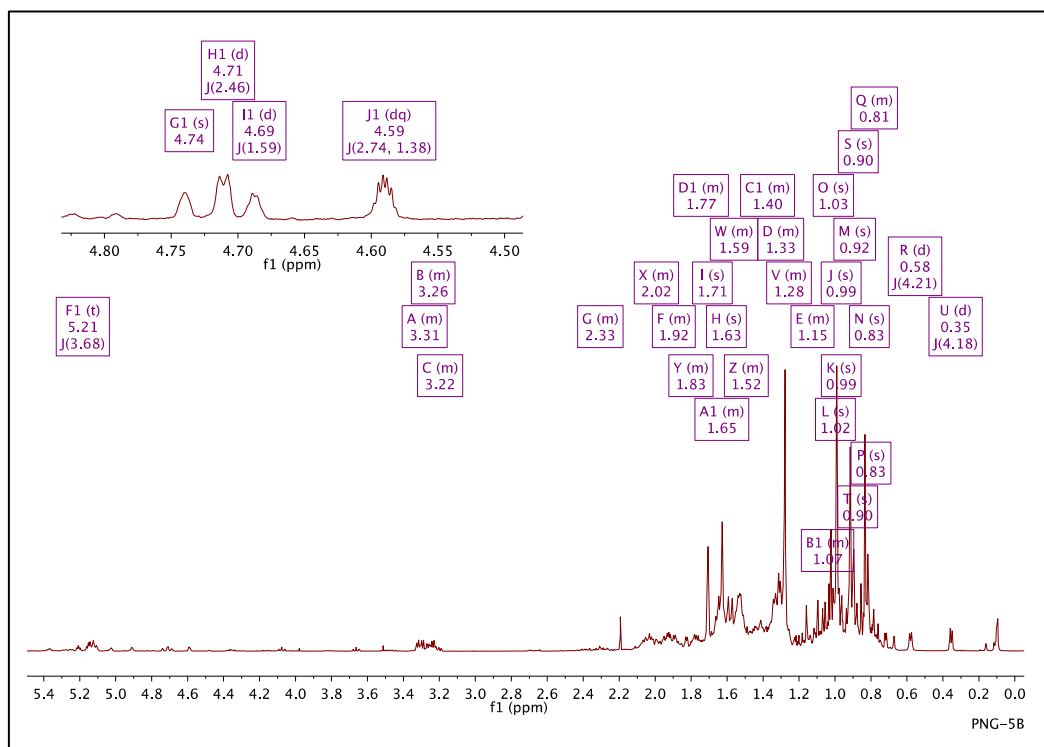

**Figure S6**  $^1\text{H}$  NMR (500 MHz) spectrum of the mixture of cycloartenol, 24 (28)-cethylenecycloartenol and cycloeucalenol in  $\text{CDCl}_3$

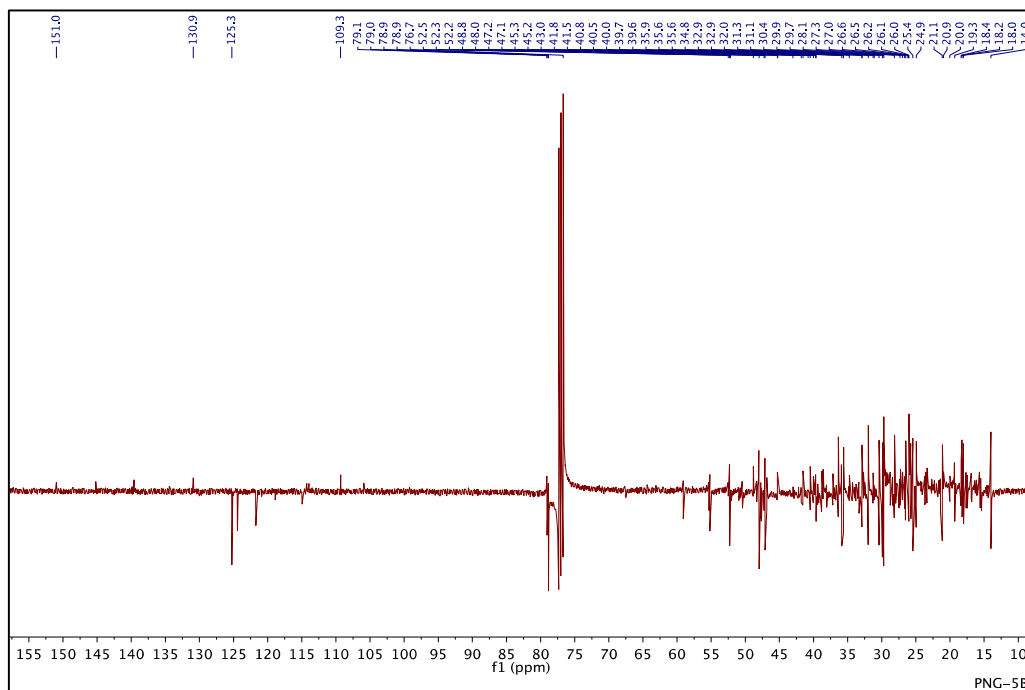

**Figure S7** Dept q NMR (100 MHz) spectrum of the mixture of cycloartenol, 24 (28)-methylenecycloartenol and cycloeucalenol in  $\text{CDCl}_3$

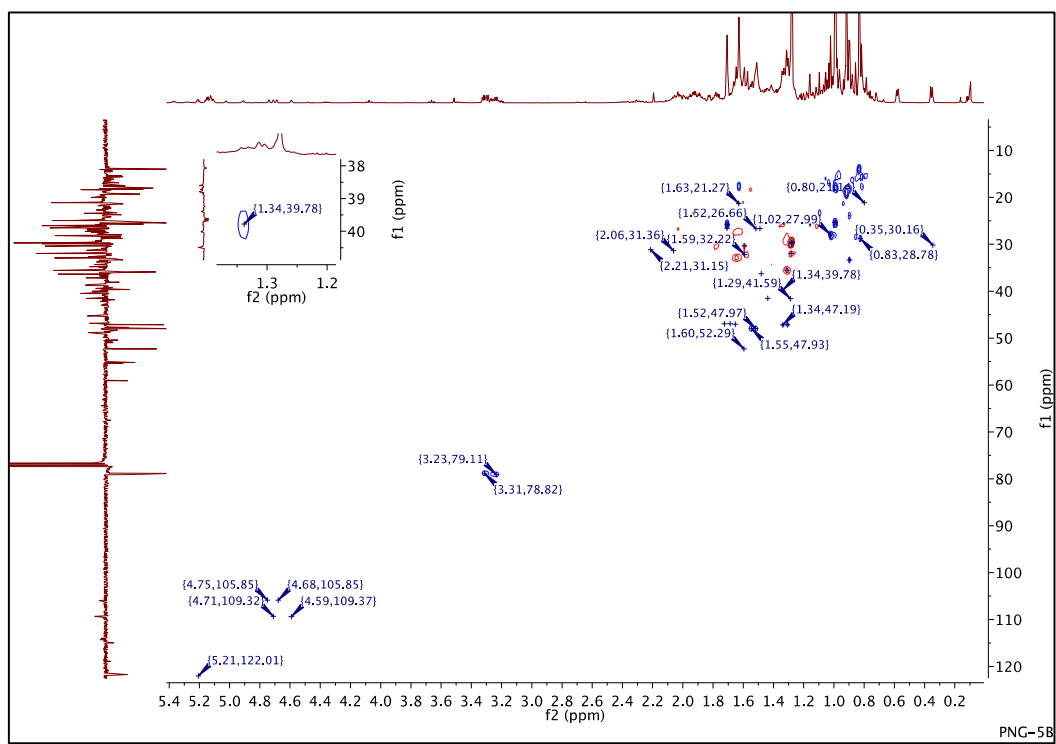

**Figure S8** HSQC (500 MHz) spectrum of the mixture of cycloartenol, 24 (28)-methylenecycloartenol and cycloeucalenol in  $\text{CDCl}_3$



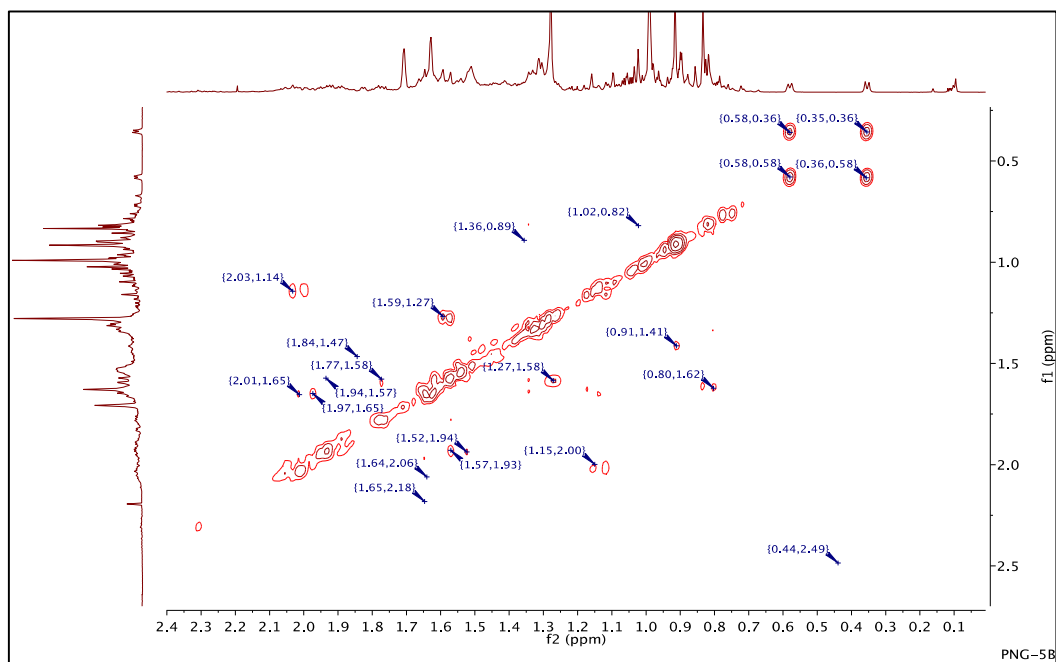

**Figure S9** COSY (500 MHz) Spectrum of the mixture of cycloartenol, 24 (28)-methylenecycloartenol and cycloeucalenol in CDCl<sub>3</sub>

S2 Characterisation of PNG-F4-11 as Betulin

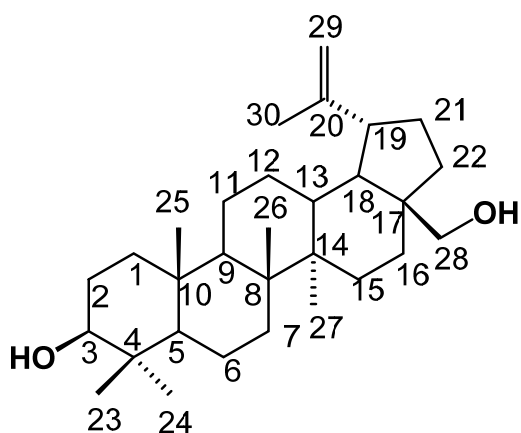

Figure S10 Structure of betulin

Table S2:  $^1\text{H}$  (500MHz),  $^{13}\text{C}$  (100MHz) data of betulin

| Position | Compound                                 |                                     |
|----------|------------------------------------------|-------------------------------------|
|          | (10)                                     |                                     |
|          | Betulin                                  |                                     |
|          | $^1\text{H}$ $\delta$ ppm (mult, J (Hz)) | $^{13}\text{C}$ $\delta$ ppm (mult) |
| 1        | 1.66 1H (m) 0.89 1H (m)                  | 37.3 (CH <sub>2</sub> )             |
| 2        | 1.57 1H (m) 1.07 1H (m)                  | 28.0 (CH <sub>2</sub> )             |
| 3        | 3.19 1H (dd, J = 11.4, 4.8)              | 79.0 (CH)                           |
| 4        | -                                        | 38.7 (C)                            |
| 5        | 0.68 1H (m)                              | 55.3 (CH)                           |
| 6        | 1.52 1H (dt J = 11.1, 4.1) 1.41 1H (m)   | 18.4 (CH <sub>2</sub> )             |
| 7        | 1.41 2H (m)                              | 34.2 (CH <sub>2</sub> )             |
| 8        | -                                        | 38.9 (C)                            |
| 9        | 1.27 1H (m)                              | 50.4 (CH)                           |
| 10       | -                                        | 37.2 (C)                            |
| 11       | 1.41 2H (m)                              | 20.8 (CH <sub>2</sub> )             |
| 12       | 1.66 1H (m) 1.07 1H (m)                  | 25.2 (CH <sub>2</sub> )             |
| 13       | 1.66 1H (m), 0.97 1H (m)                 | 28.0 (CH)                           |
| 14       | -                                        | 40.9 (C)                            |
| 15       | 1.61 1H (m), 1.07 1H (m)                 | 27.1 (CH <sub>2</sub> )             |
| 16       | 1.95 1H (m), 1.27 1H (m)                 | 29.2 (CH <sub>2</sub> )             |
| 17       | -                                        | 42.7 (C)                            |
| 18       | 1.57 1H (m),                             | 48.8 (CH)                           |
| 19       | 2.38 1H (td, J = 11.0, 5.8)              | 47.8 (CH)                           |
| 20       | -                                        | 150.5 (C)                           |

|    |                                                           |                          |
|----|-----------------------------------------------------------|--------------------------|
| 21 | 1.411H (m), 1.20 1H (m)                                   | 29.8 (CH <sub>2</sub> )  |
| 22 | 1.85 1H (ddd, $J = 12.3, 8.5, 1.3$ ) 1.07 1H (m)          | 34.0 (CH <sub>2</sub> )  |
| 23 | 0.97 3H (s)                                               | 28.0 (CH <sub>3</sub> )  |
| 24 | 0.76 3H (s)                                               | 15.4 (CH <sub>3</sub> )  |
| 25 | 0.82 3H (s)                                               | 16.1 (CH <sub>3</sub> )  |
| 26 | 0.98 3H (s)                                               | 16.0 (CH <sub>3</sub> )  |
| 27 | 1.02 3H (s)                                               | 14.8 (CH <sub>3</sub> )  |
| 28 | 3.80 1H (dd, $J = 10.8, 1.9$ )<br>3.33 1H (d $J = 10.6$ ) | 60.6 (CH <sub>2</sub> )  |
| 29 | 4.68 1H (d $J = 2.2$ )<br>4.58 1H (m)                     | 109.7 (CH <sub>2</sub> ) |
| 30 | 1.68 3H (s)                                               | 19.1 (CH <sub>3</sub> )  |

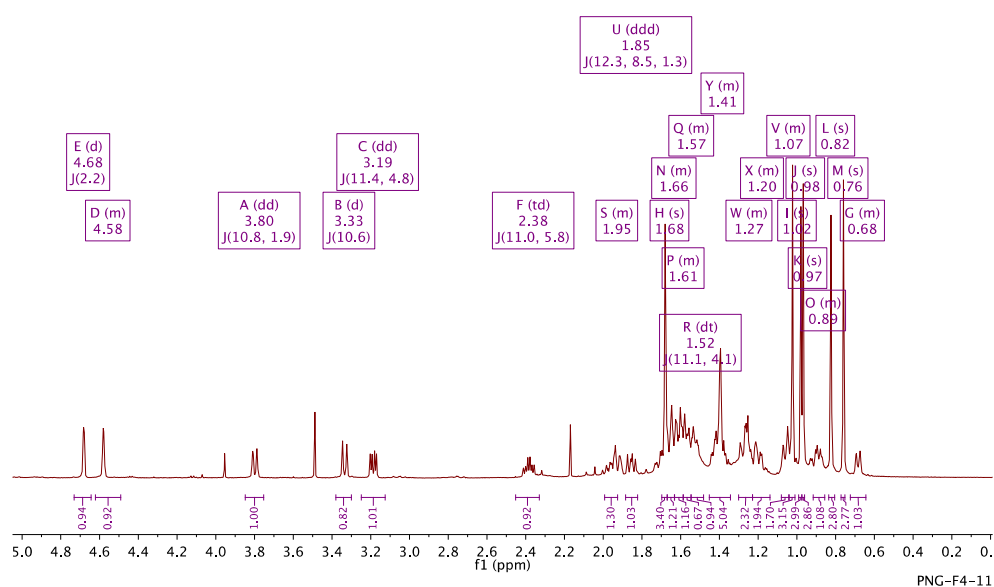

**Figure S11** <sup>1</sup>H NMR (500 MHz) spectrum of betulin in CDCl<sub>3</sub>

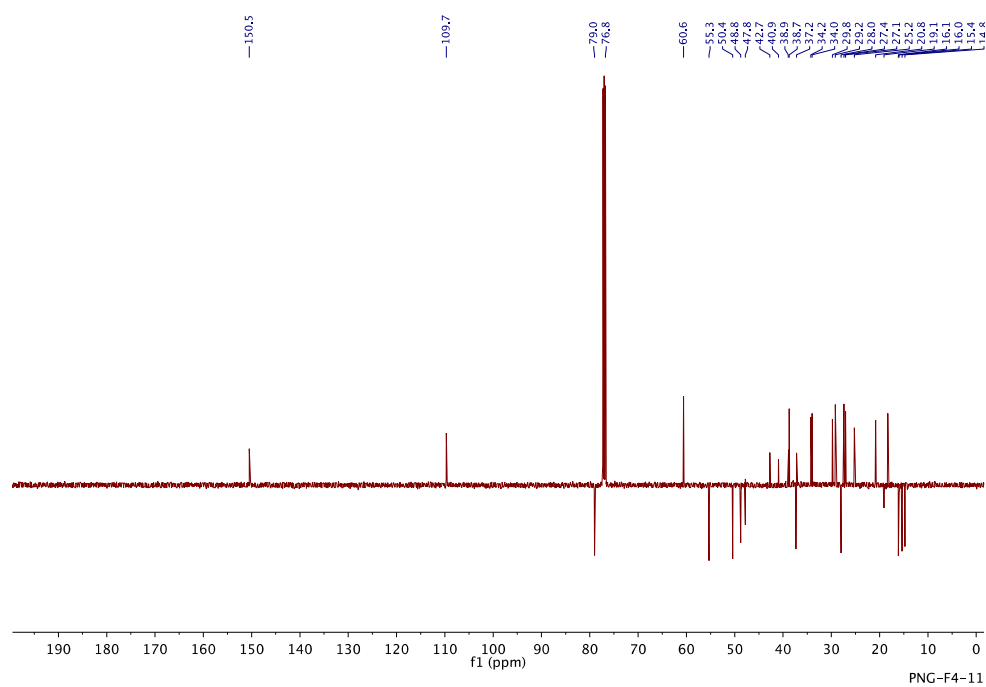

**Figure S12** DEPT 135 NMR (100 MHz) spectrum of betulin in  $\text{CDCl}_3$

*S3 Characterisation of PNG-F4-13 as Betulinic acid*

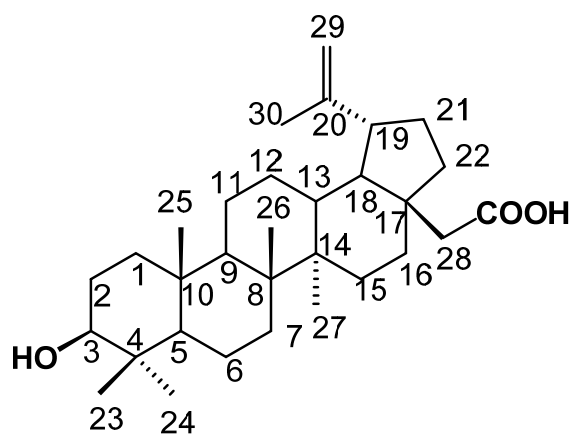

**S13** Structure of betulinic acid

**Table S3**  $^1\text{H}$  (500MHz),  $^{13}\text{C}$  (100MHz) data of betulinic acid .

| Position | $^1\text{H}$                             | $^{13}\text{C}$          |
|----------|------------------------------------------|--------------------------|
|          | $\delta$ ppm (mult, $J$ (Hz))            | $\delta$ ppm (mult)      |
| 1        | 1.57 1H (m) 0.81 1H (m)                  | 38.3 (CH <sub>2</sub> )  |
| 2        | 1.43 2H (m)                              | 27.2 (CH <sub>2</sub> )  |
| 3        | 2.95 1H (ddt, $J$ = 16.5, 11.2, 5.6)     | 76.8 (CH)                |
| 4        | -                                        | 38.5 (C)                 |
| 5        | 0.62 1H (m)                              | 54.9 (CH)                |
| 6        | 1.43 1H ( m) 1.36 1H (m)                 | 18.0 (CH <sub>2</sub> )  |
| 7        | 1.36 2H (m)                              | 33.9 (CH <sub>2</sub> )  |
| 8        | -                                        | 40.3 (C)                 |
| 9        | 1.25 1H (dd, $J$ = 12.7, 2.5)            | 49.9 (CH)                |
| 10       | -                                        | 36.7 (C)                 |
| 11       | 1.36 1H (m) 1.14 1H (m)                  | 20.5 (CH <sub>2</sub> )  |
| 12       | 1.57 1H (m) 1.09 1H (m)                  | 25.1 (CH <sub>2</sub> )  |
| 13       | 2.21 1H (td, $J$ = 12.3, 3.5)            | 37.6 (CH)                |
| 14       | -                                        | 42.0 (C)                 |
| 15       | 1.79 1H (q, $J$ = 8.2, 6.8), 1.31 1H (m) | 30.1 (CH <sub>2</sub> )  |
| 16       | 2.101H (m), 1.36 1H (m)                  | 31.7 (CH <sub>2</sub> )  |
| 17       | -                                        | 55.4 (C)                 |
| 18       | 1.50 1H (d, $J$ = 11.3)                  | 46.6 (CH)                |
| 19       | 2.95 1H (ddt, $J$ = 16.5, 11.2, 5.6)     | 48.6 (CH)                |
| 20       | -                                        | 150.4 (C)                |
| 21       | 1.31 1H (m), 1.08 1H (m)                 | 29.2 (CH <sub>2</sub> )  |
| 22       | 1.79 1H (q, $J$ = 8.2, 6.8) 1.43 1H (m)  | 36.3 (CH <sub>2</sub> )  |
| 23       | 0.86 3H (s)                              | 28.1 (CH <sub>3</sub> )  |
| 24       | 0.65 3H (s)                              | 15.7 (CH <sub>3</sub> )  |
| 25       | 0.76 3H (s)                              | 16.0 (CH <sub>3</sub> )  |
| 26       | 0.86 3H (s)                              | 15.8 (CH <sub>3</sub> )  |
| 27       | 0.93 3H (s)                              | 14.5 (CH <sub>3</sub> )  |
| 28       | -                                        | 177.2 (C)                |
| 29       | 4.68 1H (d, $J$ = 2.5)<br>4.56 1H (s)    | 109.6 (CH <sub>2</sub> ) |
| 30       | 1.64 3H (s)                              | 19.0 (CH <sub>3</sub> )  |

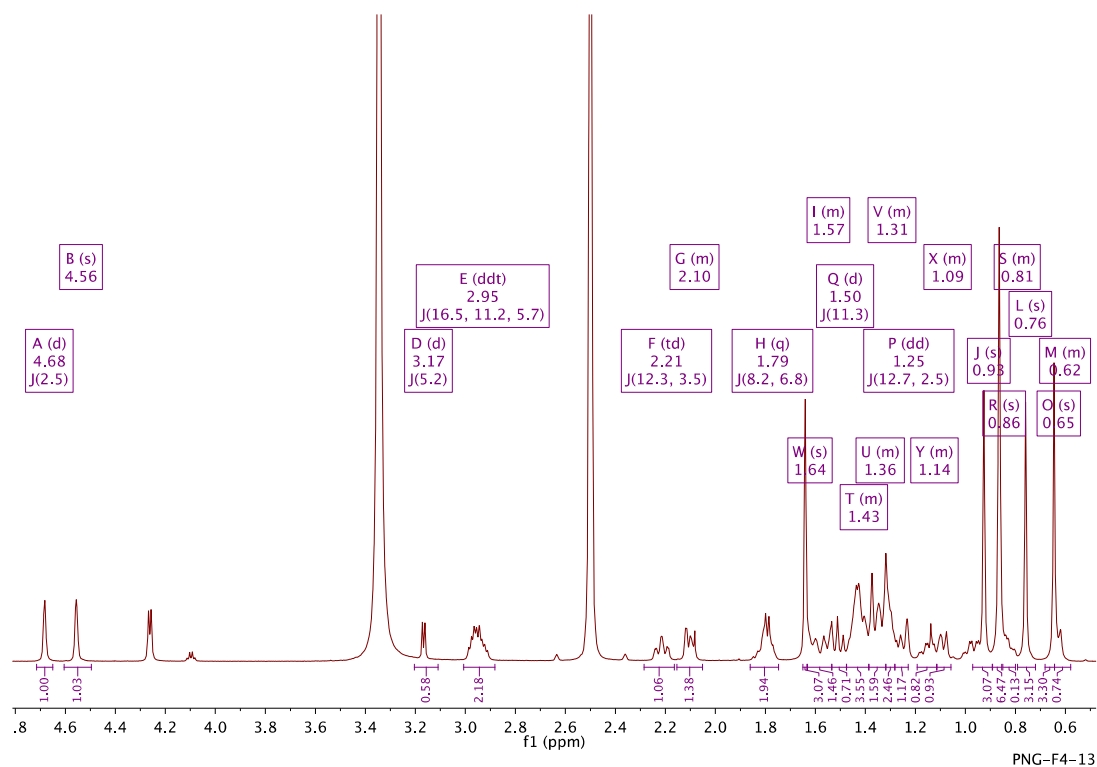

**Figure S14**  $^1\text{H}$  NMR (500 MHz) spectrum of betulinic acid in DMSO- $d_6$ .

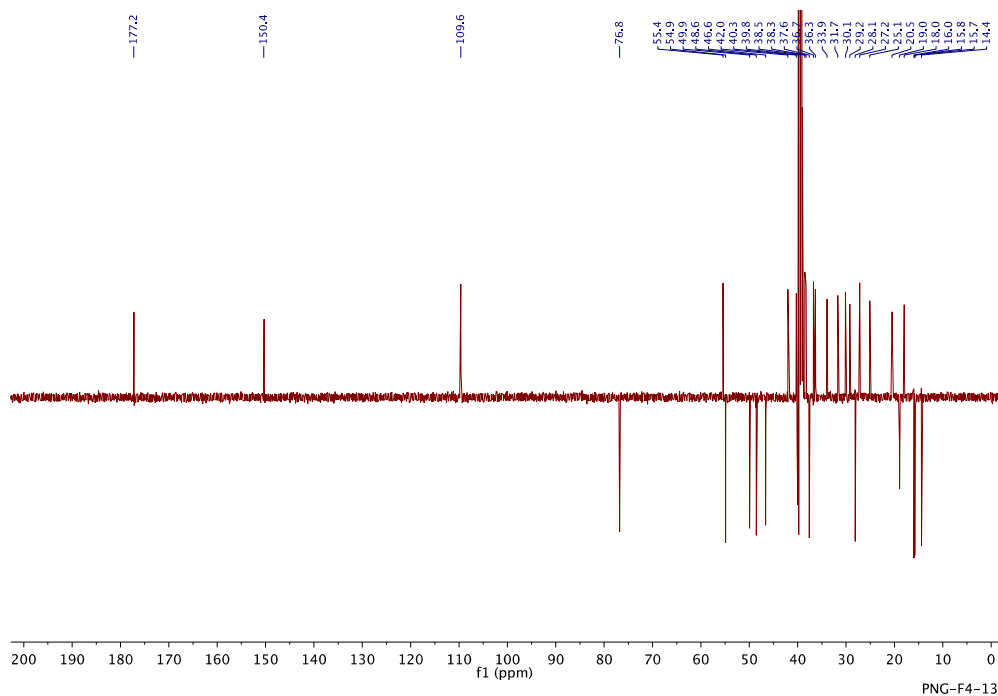

**Figure S15** Dept q NMR (100 MHz) spectrum of betulinic acid in DMSO- $d_6$ .

*S4 Characterization of PNG-F4-18 as Madecassic acid*

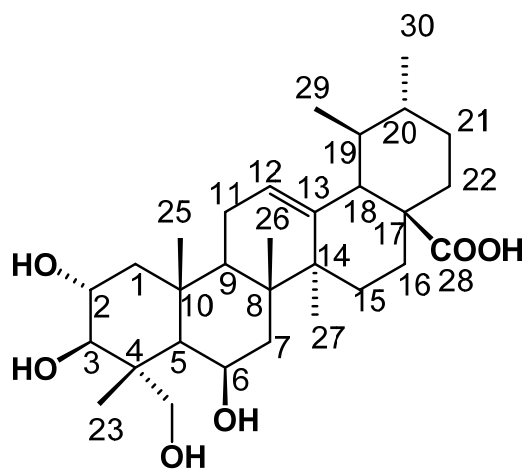

**Figure S16** Structure of madecassic acid



**Table S4**  $^1\text{H}$  (500MHz),  $^{13}\text{C}$  (100MHz) data of madecassic acid.

| Position | Compound                                                  |                                     |
|----------|-----------------------------------------------------------|-------------------------------------|
|          | (12)                                                      |                                     |
|          | Madecassic acid                                           |                                     |
|          | $^1\text{H}$ $\delta$ ppm (mult, $J$ , (Hz))              | $^{13}\text{C}$ $\delta$ ppm (mult) |
| 1        | 0.71 1H, (t, $J$ = 11.9)<br>1.72 1H (dd, $J$ = 12.5, 4.6) | 49.2 (t)                            |
| 2        | 3.51 (1H, m)                                              | 67.5 (d)                            |
| 3        | 3.11 (1H, d, $J$ = 9.4 Hz)                                | 76.2 (d)                            |
| 4        | -                                                         | 43.4 (s)                            |
| 5        | 1.15 1H (d, $J$ = 1.8 Hz)                                 | 47.0 (d)                            |
| 6        | 4.25 (1H, m)                                              | 65.9 (CH)                           |
| 7        | 1.58 (1H, m), 1.37 (1H, m)                                | 40.0 (CH <sub>2</sub> )             |
| 8        | -                                                         | 42.2 (C)                            |
| 9        | 1.52 (1H, m)                                              | 47.3 (CH)                           |
| 10       | -                                                         | 38.3 (C)                            |
| 11       | 1.95 1H (m), 1.52 1H (m)                                  | 23.4 (CH <sub>2</sub> )             |
| 12       | 5.17 (q, 4.2)                                             | 124.9 (CH)                          |
| 13       | -                                                         | 137.7 (C)                           |
| 14       | -                                                         | 42.6 (C)                            |
| 15       | 1.87 1H, (m)<br>0.95 1H, (t, $J$ = 11.9)                  | 28.1 (CH <sub>2</sub> )             |
| 16       | 1.95 1H (m), 1.02 1H (m)                                  | 23.8 (CH <sub>2</sub> )             |
| 17       | -                                                         | 49.2 (C)                            |
| 18       | 2.12 (m)                                                  | 52.6 (CH)                           |
| 19       | 1.31 1H (m)                                               | 38.5 (CH)                           |
| 20       | 1.31 1H (m)                                               | 38.5 (CH)                           |
| 21       | 1.43 1H (m)<br>1.31 1H (m)                                | 30.2 (CH <sub>2</sub> )             |
| 22       | 1.37 (1H, m), 0.91 (1H, m)                                | 38.8(CH <sub>2</sub> )              |
| 23       | 3.51 1H (m), 3.20 1H (d, $J$ = 10.5)                      | 63.7 (t)                            |
| 24       | 0.91 (3H, s)                                              | 15.0 (CH <sub>3</sub> )             |
| 25       | 1.00 (3H, s)                                              | 18.3 (CH <sub>3</sub> )             |
| 26       | 1.28 (3H, s)                                              | 18.2 (CH <sub>3</sub> )             |
| 27       | 0.99 (3H, s)                                              | 18.3 (CH <sub>3</sub> )             |
| 28       | -                                                         | 178.3 (C)                           |
| 29       | 0.82 (3H, d, $J$ = 6.4 Hz)                                | 17.1 (CH <sub>3</sub> )             |
| 30       | 0.91 (3H, d, $J$ = 5.9 Hz)                                | 21.1 (CH <sub>3</sub> )             |

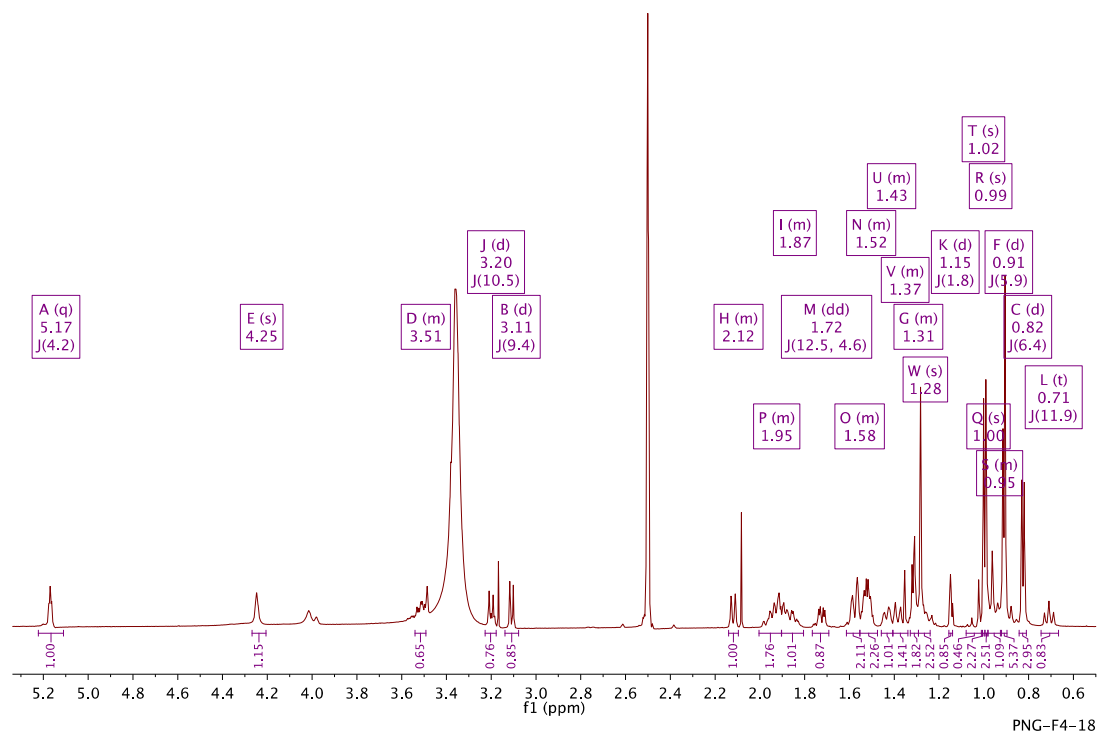

**Figure S17**  $^1\text{H}$  NMR (500 MHz) spectrum of madecassic acid in  $\text{DMSO-d}_6$ .

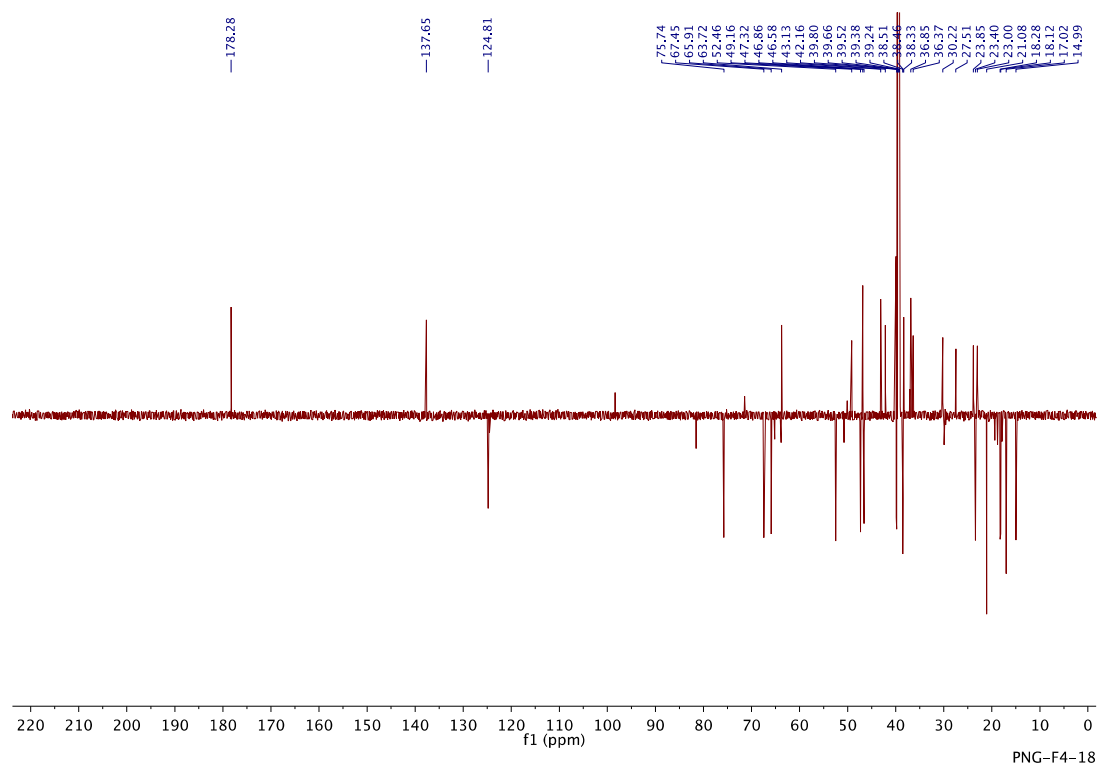

**Figure S18** Dept q NMR (100 MHz) spectrum of madecassic acid in DMSO-d<sub>6</sub>.

*S5 Characterization of PNG-F5 as 20-hydroxybetulin*

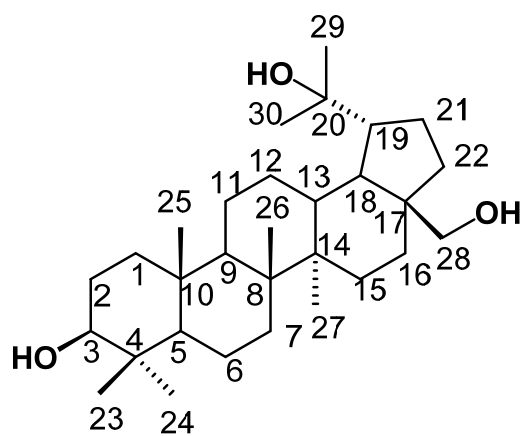

**Figure S19** Structure of 20-hydroxybetulin

**Table S5:** <sup>1</sup>H (500MHz), <sup>13</sup>C (100MHz) data for 20-hydroxy betulin.

| Position | Compound                              |                         |
|----------|---------------------------------------|-------------------------|
|          | (9)                                   |                         |
|          | 20-hydroxybetulin                     |                         |
|          | <sup>1</sup> H δ ppm (mult, J)        | <sup>13</sup> C δ ppm   |
| 1        | 1.34 1H (m), 1.15 1H (m)              | 40.6 (CH <sub>2</sub> ) |
| 2        | 1.77 1H (m), 1.68 1H (m)              | 27.8 (CH <sub>2</sub> ) |
| 3        | 3.25 1H (dd, J = 11.10 5.53)          | 79.3 (CH)               |
| 4        | -                                     | 38.2 (C)                |
| 5        | 0.87 1H (m)                           | 55.9 (CH)               |
| 6        | 1.71 1H (m), 0.85 1H (m)              | 19.6 (CH <sub>2</sub> ) |
| 7        | 2.34 1H (m), 1.65 1H (m)              | 35.2 (CH <sub>2</sub> ) |
| 8        | -                                     | 41.8 (C)                |
| 9        | 1.38 1H (m)                           | 52.0 (CH)               |
| 10       | -                                     | 39.1 (C)                |
| 11       | 1.81 1H (m), 1.05 1H (m)              | 29.1 (CH <sub>2</sub> ) |
| 12       | 1.40 1H (m), 0.84 1H (m)              | 28.8 (CH <sub>2</sub> ) |
| 13       | 1.40 1H (m)                           | 36.0 (CH)               |
| 14       | -                                     | 42.1 (C)                |
| 15       | 1.69 1H (m), 1.84 1H (m)              | 28.2 (CH <sub>2</sub> ) |
| 16       | 1.91 1H (m), 1.30 1H (m)              | 30.1 (CH <sub>2</sub> ) |
| 17       | -                                     | 48.8 (C)                |
| 18       | 1.85 1H (m)                           | 50.4 (CH)               |
| 19       | 1.37 1H (m)                           | 48.4 (CH)               |
| 20       | -                                     | 73.6 (C)                |
| 21       | 1.69 1H (m), 1.84 1H (m)              | 28.2 (CH <sub>2</sub> ) |
| 22       | 2.30 1H (m), 0.88 1H (m)              | 33.8 (CH <sub>2</sub> ) |
| 23       | 1.17 3H (s)                           | 25.2 (CH <sub>3</sub> ) |
| 24       | 0.793H (s)                            | 16.1 (CH <sub>3</sub> ) |
| 25       | 0.82 3H (s)                           | 17.0 (CH <sub>3</sub> ) |
| 26       | 1.53 3H (s)                           | 18.4 (CH <sub>3</sub> ) |
| 27       | 1.01 3H (s)                           | 15.7 (CH <sub>3</sub> ) |
| 28       | 3.93(d, J = 12.0), 4.02 (d, J = 12.0) | 62.9 (CH <sub>2</sub> ) |
| 29       | 1.77 3H (s)                           | 24.5 (CH <sub>3</sub> ) |
| 30       | 1.26 3H (s)                           | 32.0 (CH <sub>3</sub> ) |

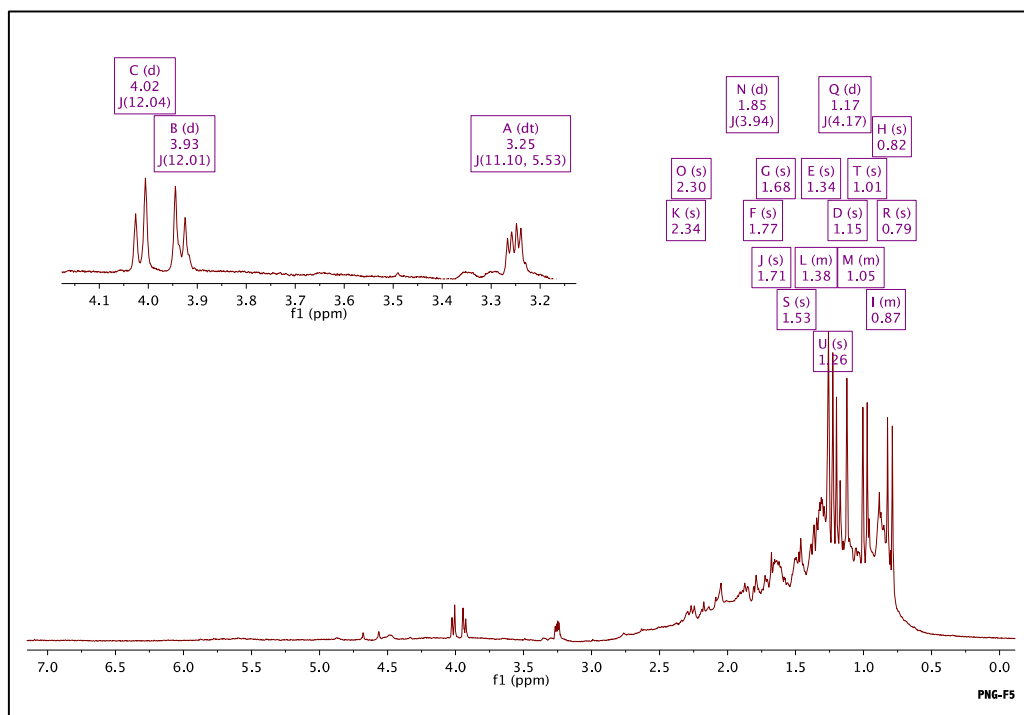

**Figure S20**  $^1\text{H}$  NMR (500 MHz) spectrum of 20-hydroxybetulin in  $\text{CDCl}_3$

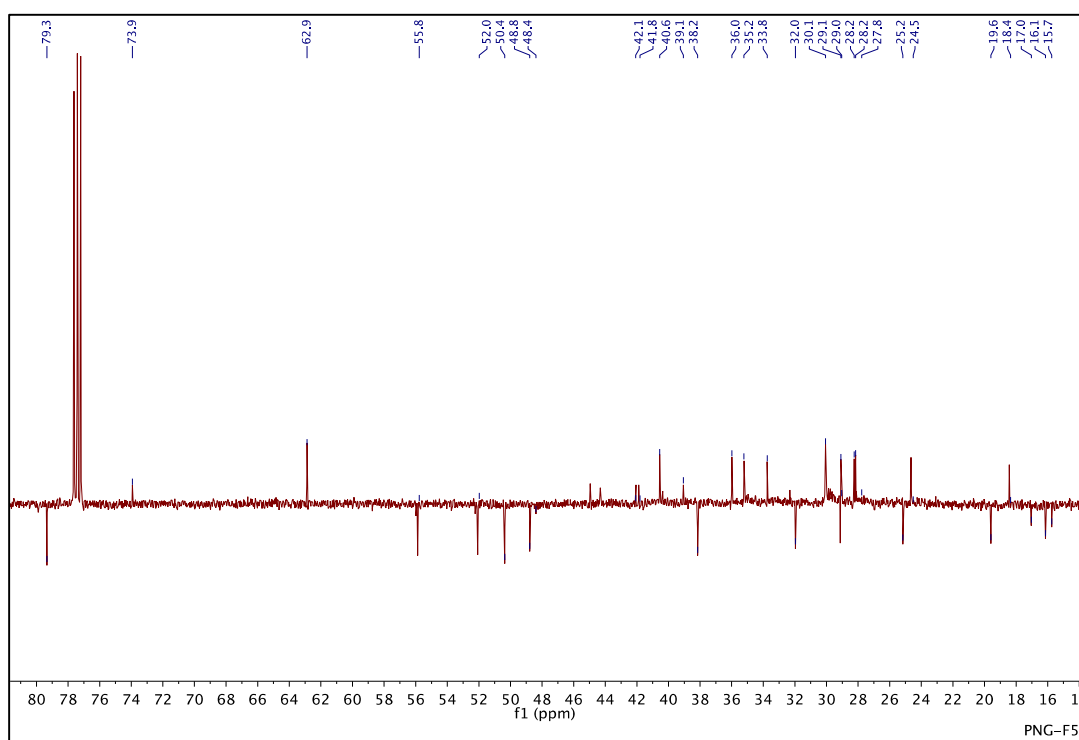

**Figure S21** Dept q NMR (100 MHz) spectrum of 20-hydroxybetulin in  $\text{CDCl}_3$

S6 Characterization of PNG-F6-S12 as Mangiferonic acid (Figure S27) and Ambonic acid (Figure S28)

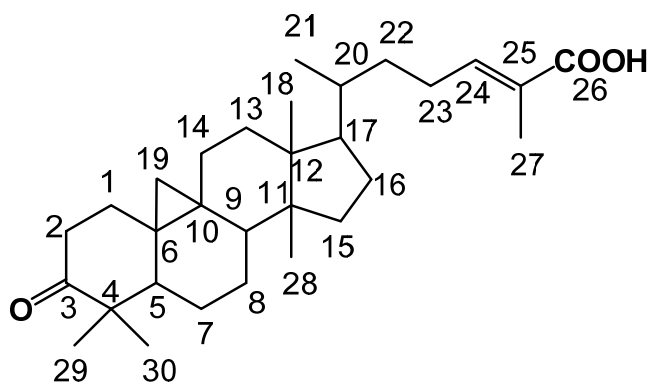

**Figure S22** Structure of mangiferonic acid

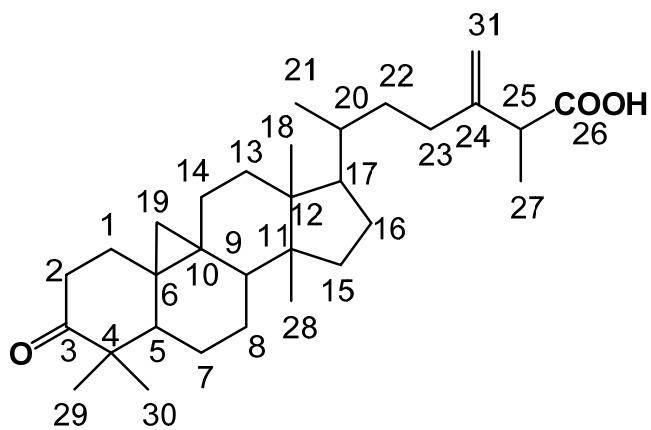

**Figure S23** Structure of ambonic acid

**Table S6:**  $^1\text{H}$  (500MHz),  $^{13}\text{C}$  (100MHz) data for mangiferonic acid and ambonic acid.

| Position | Compound                                               |                              |                                                        |                              |
|----------|--------------------------------------------------------|------------------------------|--------------------------------------------------------|------------------------------|
|          | (1)<br>Mangiferonic acid                               |                              | (5)<br>Ambonic acid                                    |                              |
|          | $^1\text{H}$ $\delta$ ppm (mult, J)                    | $^{13}\text{C}$ $\delta$ ppm | $^1\text{H}$ $\delta$ ppm (mult, J)                    | $^{13}\text{C}$ $\delta$ ppm |
| 1        | 1.88 1H (m), 1.57 1H (m)                               | 33.4 (CH <sub>2</sub> )      | 1.68 1H (m), 1.40 1H (m)                               | 32.7 (CH <sub>2</sub> )      |
| 2        | 2.73 1H (td, 13.84, 6.40)<br>2.33 1H (td, 14.17, 3.49) | 37.4 (CH <sub>2</sub> )      | 2.73 1H (td, 13.84, 6.40)<br>2.33 1H (td, 14.17, 3.49) | 37.4 (CH <sub>2</sub> )      |
| 3        | -                                                      | 216.6 (C)                    | -                                                      | 216.6 (C)                    |
| 4        | -                                                      | 50.2 (C)                     | -                                                      | 50.2 (C)                     |
| 5        | 1.73 1H (dd, 12.17, 4.33)                              | 48.4 (CH)                    | 1.73 1H (dd, 12.17, 4.33)                              | 48.4 (CH)                    |
| 6        | 1.57 1H (m), 0.97 1H (m)                               | 21.5 (CH <sub>2</sub> )      | 1.57 1H (m), 0.97 1H (m)                               | 21.4 (CH <sub>2</sub> )      |
| 7        | 1.40 1H (m), 1.16 1H (m)                               | 25.9 (CH <sub>2</sub> )      | 1.40 1H (m), 1.16, 1H (m)                              | 25.9 (CH <sub>2</sub> )      |
| 8        | 1.58 1H (m)                                            | 47.8 (CH)                    | 1.58 1H (m)                                            | 47.8 (CH)                    |
| 9        | -                                                      | 21.0 (C)                     | -                                                      | 21.0 (C)                     |
| 10       | -                                                      | 25.9 (C)                     | -                                                      | 25.9 (C)                     |
| 11       | 2.07 1H (m), 1.19 (m)                                  | 26.7 (CH <sub>2</sub> )      | 2.07 1H (m), 1.19 1H (m)                               | 26.6 (CH <sub>2</sub> )      |
| 12       | 1.68 1H (m), 1.19 1H (m)                               | 32.7 (CH <sub>2</sub> )      | 2.07 1H (m), 1.68 1H (m)                               | 32.7 (CH <sub>2</sub> )      |
| 13       | -                                                      | 45.3 (C)                     | -                                                      | 45.3 (C)                     |
| 14       | -                                                      | 48.7 (C)                     | -                                                      | 48.7 (C)                     |
| 15       | 1.58 1H (m), 1.40 1H (m)                               | 35.5 (CH <sub>2</sub> )      | 1.58 1H (m), 1.40 1H(m)                                | 35.5 (CH <sub>2</sub> )      |
| 16       | 1.91 1H (m), 1.68 1H (m)                               | 28.0 (CH <sub>2</sub> )      | 1.91 1H (m), 1.68 1H (m)                               | 28.0 (CH <sub>2</sub> )      |
| 17       | 1.68 1H (m)                                            | 52.2, 1H<br>(CH)             | 1.68, 1H (m)                                           | 52.2 (CH)                    |
| 18       | 1.01 3H (s)                                            | 18.0 (CH <sub>3</sub> )      | 01.02 3H (s)                                           | 18.0 (CH <sub>3</sub> )      |
| 19       | 0.81 1H (d, 3.55)<br>0.59 1H (d, 3.73)                 | 29.5 (CH <sub>2</sub> )      | 0.81 1H (d, 3.55)<br>0.59 1H (d, 3.73)                 | 29.5 (CH <sub>2</sub> )      |
| 20       | 1.40 1H (m)                                            | 35.9 (CH)                    | 1.40 1H (m)                                            | 35.9 (CH)                    |
| 21       | 0.94 3H (d, 6.31)                                      | 18.2 (CH <sub>3</sub> )      | 0.94 3H (d, 6.31)                                      | 18.2 (CH <sub>3</sub> )      |
| 22       | 1.19 1H (m), 1.58 1H (m)                               | 34.7 (CH <sub>2</sub> )      | 1.19 1H (m), 1.58 1H (m)                               | 34.5 (CH <sub>2</sub> )      |
| 23       | 2.28 1H (m), 2.15 1H (m)                               | 25.8 (CH <sub>2</sub> )      | 2.21 2H (m)                                            | 31.6 (CH <sub>2</sub> )      |
| 24       | 6.93 1H (t, 7.52)                                      | 145.8 (CH)                   | -                                                      | 148.0 (C)                    |
| 25       | -                                                      | 126.6 (C)                    | 3.19 1H (q, 7.08)                                      | 45.6 (CH)                    |
| 26       | -                                                      | 173.3 (C)                    | -                                                      | 180.2 (C)                    |
| 27       | 1.86 3H (s)                                            | 11.9 (CH <sub>3</sub> )      | 1.33 3H (d, 7.0)                                       | 16.3 (CH <sub>3</sub> )      |
| 28       | 1.07 3H (s)                                            | 22.1 (CH <sub>3</sub> )      | 1.07 3H (s)                                            | 19.3 (CH <sub>3</sub> )      |
| 29       | 1.12 3H (s)                                            | 21.1 (CH <sub>3</sub> )      | 1.12 3H (s)                                            | 22.1 (CH <sub>3</sub> )      |
| 30       | 0.93 3H (s)                                            | 19.3 (CH <sub>3</sub> )      | 0.913H (s)                                             | 20.7 (CH <sub>3</sub> )      |
| 31       | -                                                      | -                            | 4.99 (1H, s), 4.95 (1H, s)                             | 111.0 (CH <sub>2</sub> )     |



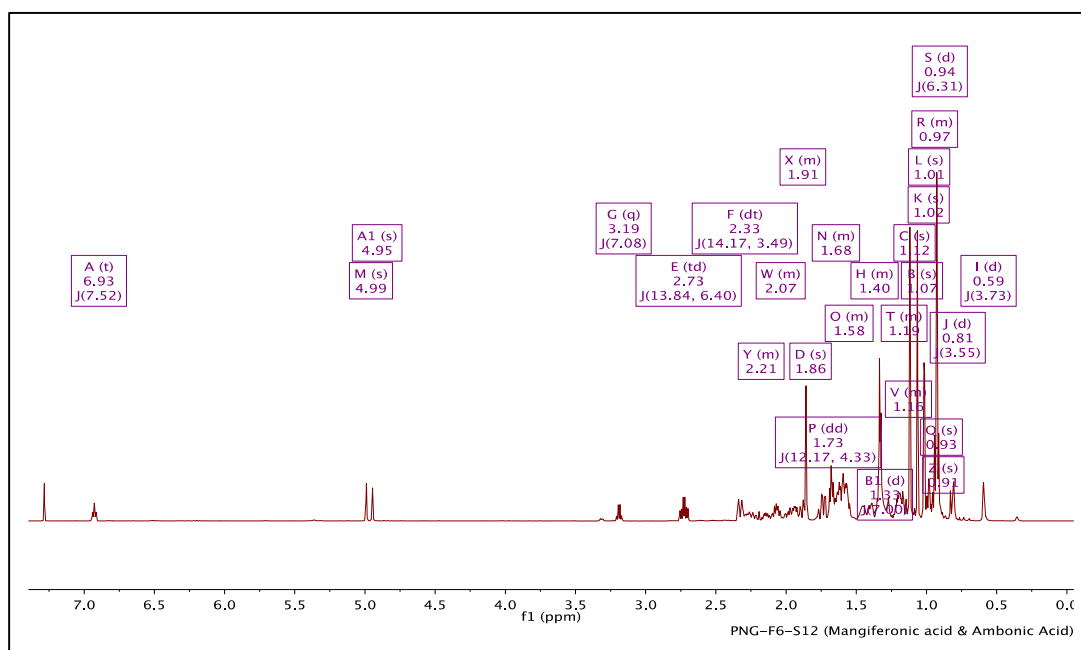

**Figure S24**  $^1\text{H}$  NMR (500 MHz) spectrum of the mixture of mangiferonic acid and ambonic acid in  $\text{CDCl}_3$

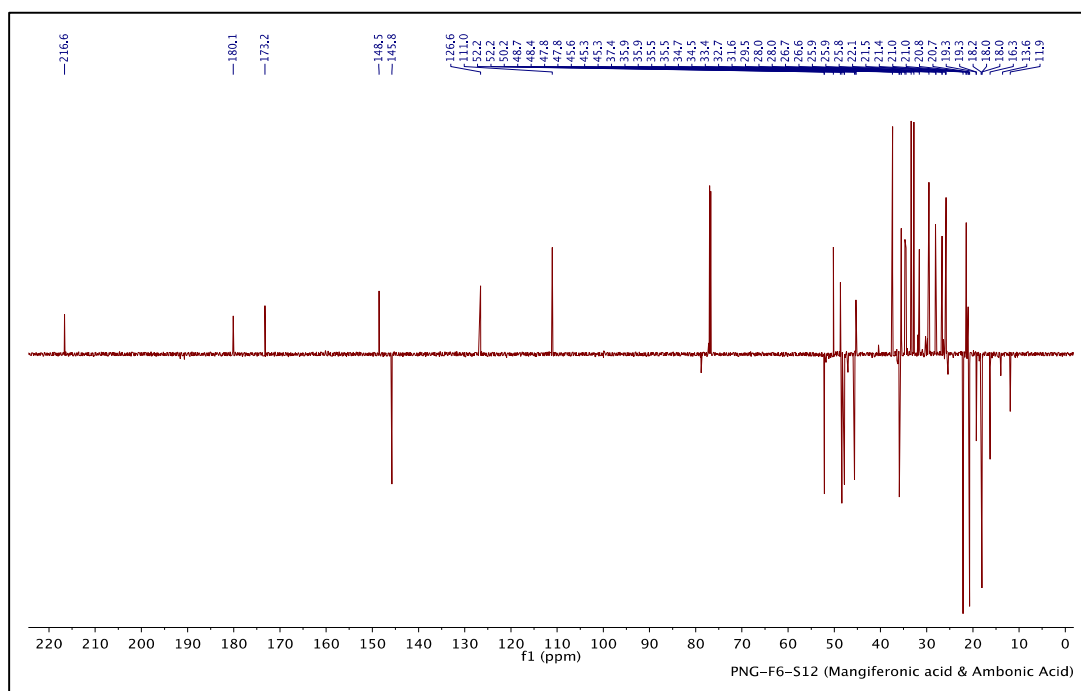

**Figure S25** Dept q NMR (100 MHz) spectrum of the mixture of mangiferonic acid and ambonic acid in CDCl<sub>3</sub>

S7 Characterization of PNG-F6-S15 as Isomangiferolic acid (Figure S32 and Ambolic acid (Figure S33)

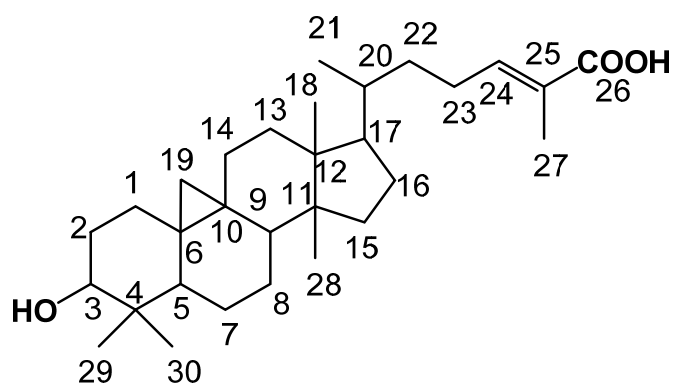

**Figure S26** Structure of Isomangiferolic acid

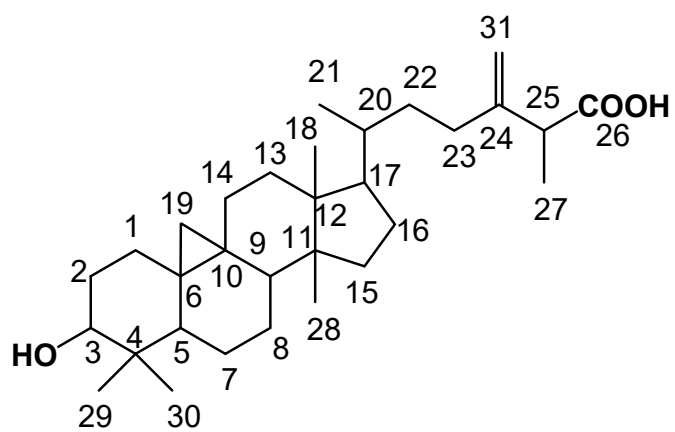

**Figure S27** Structure of Ambolic acid

**Table S7:** <sup>1</sup>H (500MHz), <sup>13</sup>C (100MHz) data for isomangiferolic acid and ambolic acid.

| Position | Compound                               |                         |                                        |                          |
|----------|----------------------------------------|-------------------------|----------------------------------------|--------------------------|
|          | (2)                                    |                         | (6)                                    |                          |
|          | Isomangiferolic acid                   |                         | Ambolic acid                           |                          |
|          | <sup>1</sup> H δ ppm (mult, J)         | <sup>13</sup> C δ ppm   | <sup>1</sup> H δ ppm (mult, J)         | <sup>13</sup> C δ ppm    |
| 1        | 1.74 1H (m), 1.04 1H (m)               | 27.5 (CH <sub>2</sub> ) | 1.92 1H (m), 1.27 1H (m)               | 32.0 (CH <sub>2</sub> )  |
| 2        | 1.92 1H (m), 1.64 1H (m)               | 28.5 (CH <sub>2</sub> ) | 1.74 1H (m), 1.52 1H (m)               | 30.3 (CH <sub>2</sub> )  |
| 3        | 3.5 1H (m)                             | 77.1 (CH)               | 3.5 1H (m)                             | 77.1 (CH)                |
| 4        | -                                      | 39.5 (C)                | -                                      | 40.5 (C)                 |
| 5        | 1.831H (m)                             | 41.1 (CH)               | 1.27 1H (m)                            | 47.1 (CH)                |
| 6        | 1.65 1H (m), 0.80 1H (m)               | 21.1 (CH <sub>2</sub> ) | 1.651H (m), 0.80 1H (m)                | 21.1 (CH <sub>2</sub> )  |
| 7        | 1.27 1H (m), 1.14 1H (m)               | 25.7 (CH <sub>2</sub> ) | 1.27 1H (m), 1.14 1H (m)               | 26.0 (CH <sub>2</sub> )  |
| 8        | 1.52 1H (m)                            | 48.0 (CH)               | 1.521H (m)                             | 48.1 (CH)                |
| 9        | -                                      | 19.8 (C)                | -                                      | 19.8 (C)                 |
| 10       | -                                      | 26.5 (C)                | -                                      | 26.5 (C)                 |
| 11       | 2.03 1H (m), 1.14 (m)                  | 26.3 (CH <sub>2</sub> ) | 2.03 1H (m), 1.14 1H (m)               | 26.3 (CH <sub>2</sub> )  |
| 12       | 1.65 2H (m)                            | 32.9 (CH <sub>2</sub> ) | 1.65 2H (m)                            | 32.9 (CH <sub>2</sub> )  |
| 13       | -                                      | 45.3 (C)                | -                                      | 45.3 (C)                 |
| 14       | -                                      | 48.9 (C)                | -                                      | 48.9 (C)                 |
| 15       | 1.34 2H (m)                            | 35.5 (CH <sub>2</sub> ) | 1.34 2H (m)                            | 35.5 (CH <sub>2</sub> )  |
| 16       | 1.92 1H (m), 1.30 1H (m)               | 28.1 (CH <sub>2</sub> ) | 1.92 1H (m), 1.30 1H (m)               | 28.1 (CH <sub>2</sub> )  |
| 17       | 1.65 1H (m)                            | 52.2 (CH)               | 1.65 1H (m)                            | 52.2 (CH)                |
| 18       | 0.90 3H (s)                            | 18.0 (CH <sub>3</sub> ) | 0.90 3H (s)                            | 18.1 (CH <sub>3</sub> )  |
| 19       | 0.54 1H (d, 4.09)<br>0.37 1H (d, 4.03) | 29.8 (CH <sub>2</sub> ) | 0.54 1H (d, 4.09)<br>0.37 1H (d, 4.03) | 29.8 (CH <sub>2</sub> )  |
| 20       | 1.44 1H (m)                            | 36.0 (CH)               | 1.44 1H (m)                            | 36.0 (CH)                |
| 21       | 0.92 3H (d, 6.31)                      | 18.0 (CH <sub>3</sub> ) | 0.94 3H (d, 6.31)                      | 18.1 (CH <sub>3</sub> )  |
| 22       | 1.58 1H (m), 1.19 1H (m)               | 34.8 (CH <sub>2</sub> ) | 1.58 1H (m), 1.19 1H (m)               | 34.6 (CH <sub>2</sub> )  |
| 23       | 2.27 1H (m), 2.14 1H (m)               | 25.9 (CH <sub>2</sub> ) | 2.03 1H (m), 1.92 1H (m)               | 25.9 (CH <sub>2</sub> )  |
| 24       | 6.92 1H (t d, 7.52, 1.57)              | 145.7 (CH)              | -                                      | 148.7 (C)                |
| 25       | -                                      | 126.6 (C)               | 3.19 1H (q, 7.13)                      | 45.6 (CH)                |
| 26       | -                                      | 173.0 (C)               | -                                      | 45.7 (C)                 |
| 27       | 1.86 3H (s)                            | 12.0 (CH <sub>3</sub> ) | 1.32 3H , 7.05)                        | 16.3 (CH <sub>3</sub> )  |
| 28       | 0.99 3H (s)                            | 25.8 (CH <sub>3</sub> ) | 0.99 3H (s)                            | 25.4(CH <sub>3</sub> )   |
| 29       | 0.97 3H (s)                            | 21.2 (CH <sub>3</sub> ) | 0.83 3H (s)                            | 14.0 (CH <sub>3</sub> )  |
| 30       | 0.92 3H (s)                            | 19.3 (CH <sub>3</sub> ) | 0.92 3H (s)                            | 19.3 (CH <sub>3</sub> )  |
| 31       | -                                      | -                       | 4.98 (1H, s)<br>4.94 (1H, s)           | 111.0 (CH <sub>2</sub> ) |

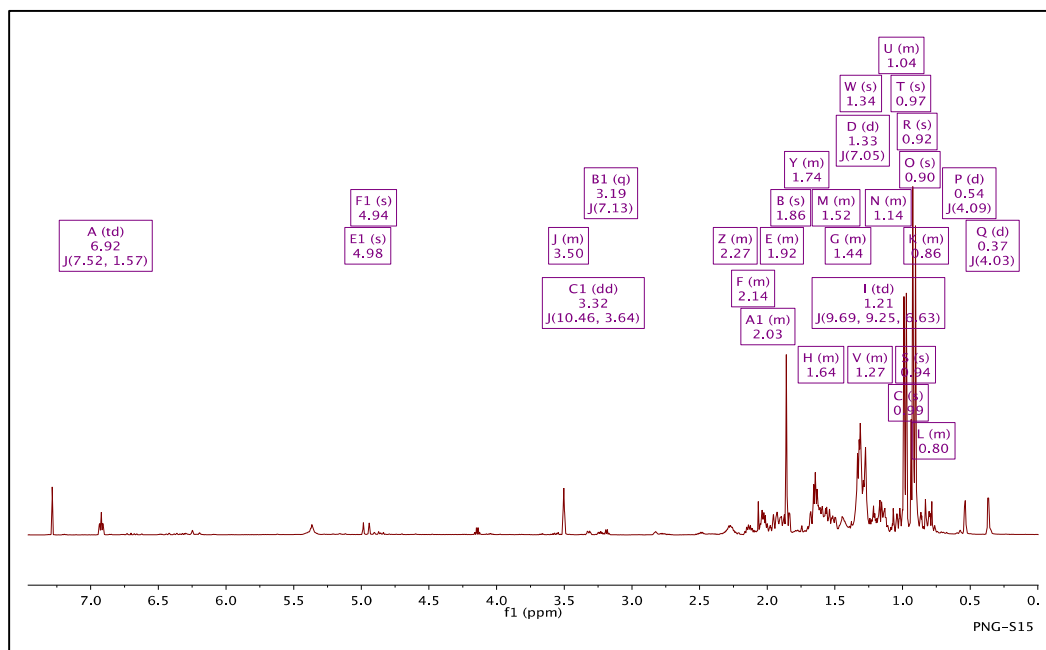

**Figure S28**  $^1\text{H}$  NMR (500 MHz) spectrum of the mixture of isomangiferolic acid and ambolic acid in  $\text{CDCl}_3$ .

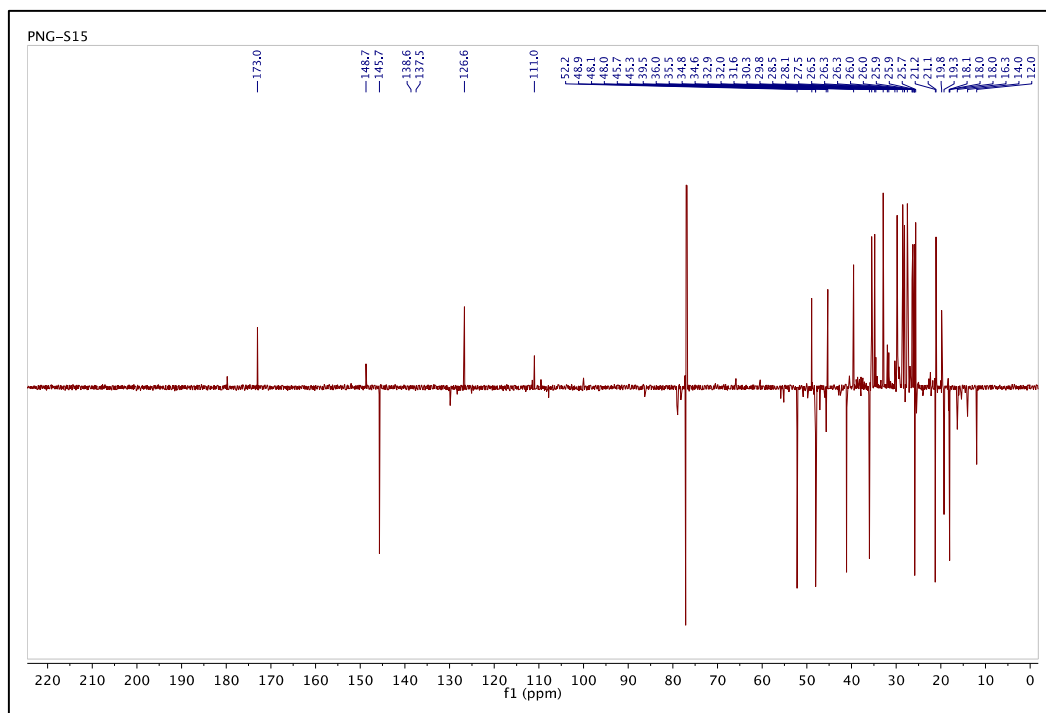

**Figure S29** DEPT q NMR (100 MHz) spectrum of the mixture of isomangiferolic acid and ambolic acid in  $\text{CDCl}_3$ .

S8 Characterisation of PNGS17 as hydroxymangiferolic acid

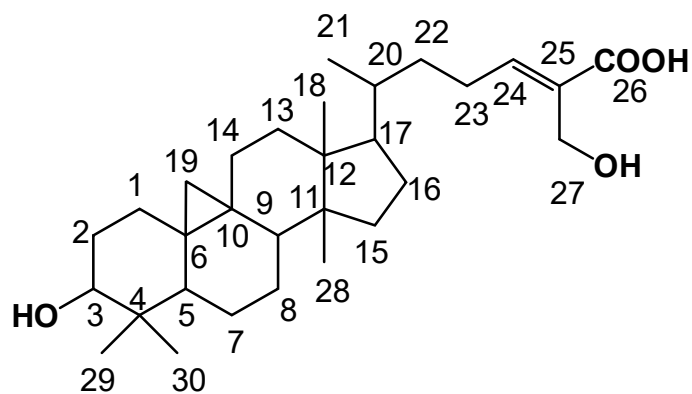

**Figure S30** Structure of 27- Hydroxyisomangiferolic acid

**Table S8**  $^1\text{H}$  (500MHz),  $^{13}\text{C}$  (100MHz) data for 27- Hydroxyisomangiferolic acid.

| Position | Compound                             |                              |
|----------|--------------------------------------|------------------------------|
|          | (3)                                  |                              |
|          | 27- Hydroxyisomangiferolic acid      |                              |
|          | $^1\text{H}$ $\delta$ ppm (mult, J)  | $^{13}\text{C}$ $\delta$ ppm |
| 1        | 1.851H (m), 1.26 1H (m)              | 28.1 (CH <sub>2</sub> )      |
| 2        | 1.92 1H (m), 1.55 1H (m)             | 29.1 (CH <sub>2</sub> )      |
| 3        | 3.06 1H (q, 4.75)                    | 77.1 (CH)                    |
| 4        | -                                    | 39.6 (C)                     |
| 5        | 1.78 1H (m)                          | 40.6 (CH)                    |
| 6        | 1.47 1H (m), 0.75 1H (m)             | 21.1 (CH <sub>2</sub> )      |
| 7        | 1.26 1H (m), 1.14 1H (m)             | 25.0 (CH <sub>2</sub> )      |
| 8        | 1.55 1H (m)                          | 47.8 (CH)                    |
| 9        | -                                    | 19.5 (C)                     |
| 10       | -                                    | 26.7 (C)                     |
| 11       | 2.21 1H (s), 1.14 1H (m)             | 26.3 (CH <sub>2</sub> )      |
| 12       | 1.55 2H (m)                          | 33.0 (CH <sub>2</sub> )      |
| 13       | -                                    | 45.3 (C)                     |
| 14       | -                                    | 48.9 (C)                     |
| 15       | 1.26 2H (m)                          | 35.5 (CH <sub>2</sub> )      |
| 16       | 1.92 1H (m), 1.26 1H (m)             | 28.2 (CH <sub>2</sub> )      |
| 17       | 1.60 1H (m)                          | 52.1 (CH)                    |
| 18       | 0.94 3H (s)                          | 18.3 (CH <sub>3</sub> )      |
| 19       | 0.49 1H (d, 3.96), 0.30 1H (d, 3.86) | 29.7 (CH <sub>2</sub> )      |
| 20       | 1.47 1H (m)                          | 35.9 (CH)                    |
| 21       | 0.87 3H (d, 3.55)                    | 18.4 (CH <sub>3</sub> )      |
| 22       | 1.55 1H (m), 1.14 1H (m)             | 35.5 (CH <sub>2</sub> )      |
| 23       | 2.29 1H (m), 2.12 1H (m)             | 26.1 (CH <sub>2</sub> )      |
| 24       | 6.62 1H (t, 7.7)                     | 145.8 (CH)                   |
| 25       | -                                    | 132.8 (C)                    |
| 26       | -                                    | 171.1 (C)                    |
| 27       | 4.11 2H (s)                          | 55.8 (CH <sub>2</sub> )      |
| 28       | 0.94 3H (s)                          | 26.1 (CH <sub>3</sub> )      |
| 29       | 0.88 3H (s)                          | 21.7 (CH <sub>3</sub> )      |
| 30       | 0.88 3H (s)                          | 19.8 (CH <sub>3</sub> )      |

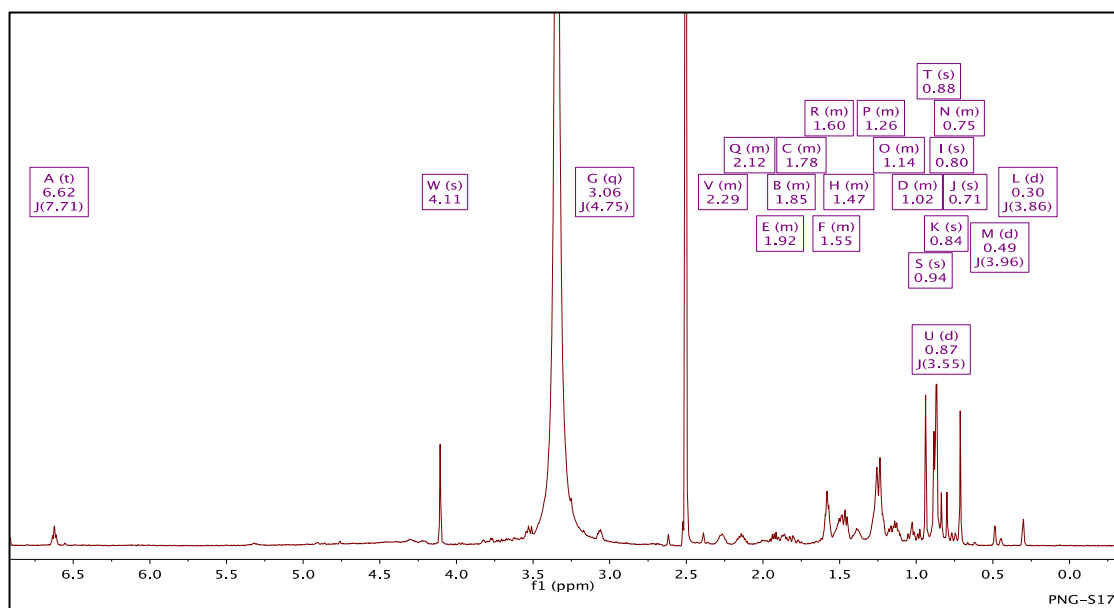

Figure S31  $^1\text{H}$  NMR (500 MHz) spectrum for 27- hydroxyisomangiferolic acid in DMSO- $d_6$

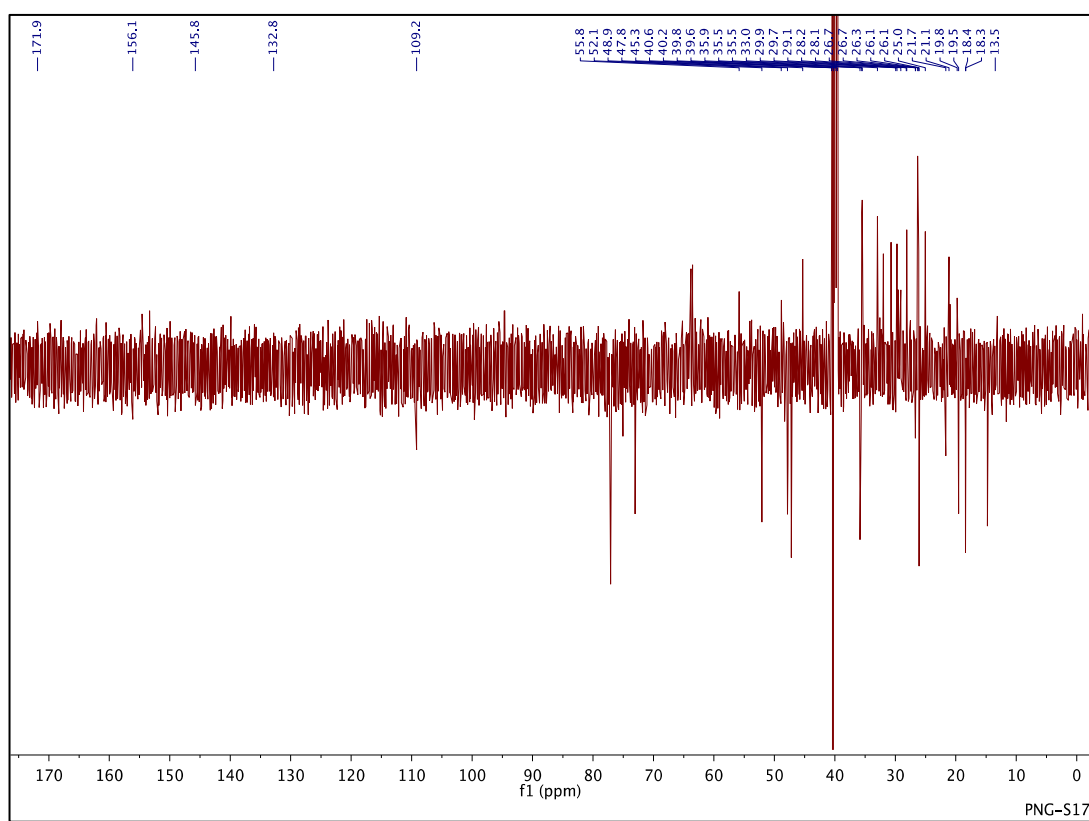

Figure S32 Dept q (100 MHz) spectrum of 27- hydroxyisomangiferolic acid in DMSO- $d_6$ .
